# Supplementary material for: Discovery of novel astrovirus genotype species in small ruminants
Source: PeerJ. 2019 Jul 31;7:e7338. doi: 10.7717/peerj.7338 (PMC6679648; doi:10.7717/peerj.7338)
Supplement: Supplemental Information 2 [file peerj-07-7338-s002.xlsx]

## Sheet: astrohits
scaffold_id	scfd_name	scaffold_length	scaffold_kmercov	blastn_besthit	blastn_identity	blastn_hitlength	DIAMOND_besthit	DIAMOND_identity	DIAMOND_hitlength	sequence
G1.1	NODE_160_length_3836_cov_54.008897	3836	54.0089	LC201585.1_Porcine_astrovirus_2_genes_for_ORF1ab,_ORF1a,_ORF2,_complete_cds,_strain:_PoAstV2/JPN/Bu5-10-1/2014	73.518	1518	tr|A0A0M4TPM8|A0A0M4TPM8_9VIRU_ORF1ab_OS=Bovine_astrovirus_OX=1435485_PE=4_SV=1	79	504	CAGAAAACAGAAAACAATCACAGATGCACGGCTACACGTCCAGCCCCAGGGCATAGGCCCTGGCGCTGGGCGGGGACAAGCCATCAGCCAGTGCATCATGGTACATTTCGCCAAAGCGAATGTACTCATCACTCGGGTGGATTTGATTAACTGCCAACCGAGCGGCTCGGTCTGTGCTAGTTTGTACTAGCGTGTCATATAAATCCTGCGCCTCGGGCCGAACAACGAGGACACTCAGCGGAGGGTCTGAATAGCGGTCACCCGGTGCAAGCTCCATATCACCAAGCTCCTCCAAATTATCATCCAAGGAAAGTTCATCAAGGTGCTCCATTGCGTCCTCAAAGGTATGGGCTAGCGTATTGATAACATTGATCTCACCATCACGGAAAGGCTGGAACT…
G1.2	NODE_371_length_2452_cov_10.270968	2452	10.271	NC_023630.1_Bovine_astrovirus_B76-2/HK,_complete_genome	80.033	2399	tr|A0A0M3VGG1|A0A0M3VGG1_9VIRU_ORF1a_OS=Bovine_astrovirus_OX=1435485_PE=4_SV=1	89.5	657	AAGCAGTGGTATCAACGCAGAGTACGGGCTGGCATACAGCACATGGCCTTACGACAACCTCCACGACAGACTCCACCGATCCAATGGAGATGCTCAAGCTGAACATTTGGCTTGAGAACTTTGTGTCAGAAGCCAAACACGTCATACACACGCACAGGACAACGGTTGTAGACGCACTCCGGTCCTCTCCATCATGGGTCTTAGCGAGCTTAGTGATGCCTCACTTGTGGACGGCCGTGACTGTAGTGCTAGGGGTCATCTCTGTTTACAAATCTGAACGTAGGGTCCTTTCTATCTGTTTTCTTGCTGCCGCAACTTTCAGTGGGGGTGACTGGGTCTTCCTTTCCAGCGCATCGATGCAGACCACCATCAGTGCCGTTAGCCAAATCGCATGTGTGG…
G1.3	NODE_475_length_2101_cov_9.290274	2101	9.29027	NC_023631.1_Bovine_astrovirus_B18/HK,_complete_genome	78.994	338	tr|A0A060BCT2|A0A060BCT2_9VIRU_Capsid_polyprotein_VP90_OS=Bovine_astrovirus_OX=1435485_PE=3_SV=1	72.7	697	GTAACCGTGTGGTTTTCCAGAAGATCAGTACGACACTCGGGACGGTTGGATCAAACGGGAGTGAGCAGATCGAGTGTGAGCTGACATGCCTCATGAACCCAGCTACAATGAAAGAGGCGACTGGTAGTAACAGCTTCAGCCCACTTGGCATTTATGCTTCCACTTATTCATTATTCCGCATGACTAGATGTGTGGTTCGGCTCAAACCACTGGTCGGGGACAGCGCGGTCTCTGGCACGATAGTTAGGGTGTCATGGAGTCCCACATCAACACCAACACAGACATCTTGGAGTGCGCTCGGTGCGCGAAAACACATTGATGTCACACCAGGCAAAAGTGGTACCTTCACGCTGACTTCTAAAGATCTCGTTGGCCCCAAAGGTGGGTGGTACAAAACAA…
G1.4	NODE_684_length_1720_cov_12.728814	1720	12.7288	none	none	none	tr|A0A0M4UFN2|A0A0M4UFN2_9VIRU_ORF1ab_OS=Bovine_astrovirus_OX=1435485_PE=4_SV=1	68.1	568	AAGCAGTGGTATCAACGCAGAGTACGGGGGCACAAAGTGGGCCCGAGGAGTTCTTAACAAGCACATGGTAAACAGGCCCAAGAGCATCAATGTCTGATGGAGTGAGGGAACGCAGCATTTCCTCCACTTCACTGGTGTCATATTCTCTGGCCAGATACTGCTTGAAGGACGGAATTACAGTCCTCTTCTGACCAAAATCATAGTCAGACTCAAAAACCCAATCATCCTCTGGGTCGTAGCCATCATCGAGAGGTTCCCAATCAGGGTAACCAGCTTCCTCCTTTCTGTAGAGGTCATCGACCATGTCACGGATCTGGTCCGCTGTAAGGCCCTCATCGATGAGCTTTTGGTATTCCTCTTCAGTAAACACTGGGCCACGTTGCTTGCGTTTCTTTGCAC…
G1.5	NODE_1962_length_931_cov_2.220149	931	2.22015	none	none	none	tr|F6LD26|F6LD26_9VIRU_Capsid_polyprotein_VP90_OS=Bovine_astrovirus_B170/HK_OX=1027244_PE=3_SV=1	80.6	165	AGCAGTGGTATCAACGCAGAGTACGGGGGTCAGCCATTTGACGTGTTTGGGGGATGTCTGTTGAAATGCCAGTATTGCCAGGCGTTATTTGCTGGAAATGCAACTGTCCAAGGTTAACAGGTGGTGCATTTGCAACGCTAGCTATGCAAGGGACAGATGCGCGGGCATCATTGATAGAGGAATACACCTCAAACCGCTCTTCACCCGCGCGTACGGGTGCACCAGCAATTCTCTTGAGGAACCACCAACCGCCCCTCAGCAACCAGCTAAACGGAGCAGGGAATGCGTTGGCTCCAGTTTGGATGATCGCATCTGTAACCATCCATATAATCTCACTAGCTGTTGTCGTAGAGGCAGCCCTGGCAAGTGCACTGGTACCAGGAACAGTCATTACAAGCT…
G1.6	NODE_3407_length_617_cov_1.385714	617	1.38571	none	none	none	tr|F6LD26|F6LD26_9VIRU_Capsid_polyprotein_VP90_OS=Bovine_astrovirus_B170/HK_OX=1027244_PE=3_SV=1	57.8	204	TTAAAATTAAAATTAAGGAACGCTTGGTGGCCTAGAGACCCAGGGCAATAGCCCTAGCTTCCCTAGGTGAAACTCCATCTACAAGCGCATCATGATACAAGGCAACAAATTCCTTGTATGTGGGGCTCGGATAGAGCTGATTCACTGCCTTCCGAGCTTCTCTTTCTGGAAAGGTGACTTTCAATGTTTCAAATAGGTCCTGTGCCTCAGGCAAGACAACCAACCGAGATATCGGTGGTTCATCATAATCCTGGCCTGGCTCCATTTCAAGATCATCGTCCTGTACATCTTCAAATTCTCCCTCGACTTCAGGGAGGTCCCCATTTGATGGCTCCTGGGTGGGAGTATACACCTGAACATTGGTCACGTTTATCTCTCCGTCCCTAAAAGGTTTGAAAG…
G2.1	NODE_326_length_6059_cov_821.992751	6059	821.993	LC047790.1_Bovine_astrovirus_genomic_RNA,_nearly_complete_genome,_strain:_BoAstV/JPN/Hokkaido11-55/2009	78.092	4528	tr|A0A0M3VGG3|A0A0M3VGG3_9VIRU_Capsid_polyprotein_VP90_OS=Bovine_astrovirus_OX=1435485_PE=3_SV=1	75.2	758	ACGGTTCTACTTTTACCCAACCACTAGGCCTGATCGCGTTTTGACCGCGAGTACTGTTTCTGAAGGTGAGTGGCGCACGTTCGTGCTTGATGTGGATCATGGTGAGCATGTTGCTGTGGAGGTCAACCACATTCGTGATCACCAGCCAACCATTCTCACTGCCGCTCTTATTCAGGACAGGTCAGAAAAGGCACGTGAAATATCCGACCTGAGGCTCAACAATGAGTTGTTGCGGGGTGAACTCGCTGTATACAGACGGGAGCATGAAGCGACCCCCCGGCTTACACTCAGTTGGCCCACTATATTTGCCTTGATTTTCCTTGGCTTCTCCCTTTTTTGGCATTCGGCGAACGGCATGACTACTACGTCGACGACTGCCGCGGCGGCTAACCCCATGGA…
G2.2	NODE_969_length_4164_cov_24.679217	4164	24.6792	NC_024297.1_Bovine_astrovirus_strain_BAstV-GX7/CHN/2014,_complete_genome	74.68	2579	tr|A0A060BLI4|A0A060BLI4_9VIRU_Capsid_polyprotein_VP90_OS=Bovine_astrovirus_OX=1435485_PE=3_SV=1	73.6	712	TTTTATCCCCTTCACCTATGCTAATTAATCACAAATGAAACTGAAAAACTGATTAAAAATTGCACGACGCGCGCGCCATCCTAGATCCCCAAGGCACAAGCTCTTGCAGACCTAGGTGATAGGCCATCAACTAACGCATCGTGGTACAAGGCAACAAATTCCTTGTACTCATCGCTCGGTTTCAGCTGATTTACTGCCAAGCGGGCATCCCGTTCTGGATAGAGCTCAAGCAAAAGCTCATAAGTTTTGCGAGCATCTGGATGAACCACCAACCGGGACATTGGTGGTGTGTCATAGTCATCAAAGGGTCCCATCTCGAGTTGTTCATCAGTGAGGTCTTCATCCTCATCGTCTGCATCATCATCACCTTCTAAGGGTGGCATGTCATGAAAGGTTTCA…
G3.1	NODE_1576_length_6093_cov_2253.248240	6093	2253.25	NC_023631.1_Bovine_astrovirus_B18/HK,_complete_genome	74.367	1619	tr|A0A0M4TPK8|A0A0M4TPK8_9VIRU_ORF1a_OS=Bovine_astrovirus_OX=1435485_PE=4_SV=1	66.3	759	GGGTTAACAGCGAGTACGGTCATTGGTGATGAGTGGCGCACGTTTGTGTGTGAGAAGTTTGGTTGTAAGCATATATTACAGGAGGTGAATTGTATTCCAGACCATCAGGCAACCATTTTAACAGCCGCTCTGATCGAGGATCGAGATCGCGTTAAACGTGAACATGCTGACCTATGTCTGCAGCACGAGCTGCTGCGAGCTGAGCTGGCACAACACCGCAAGGAGTATGCCCAGACGTACAGGGTGCGCTTCAGCTGGCCCACAATGTTAGCATTAGTGTTCCTGGGCTTTTCATTGTGCTGGCATGGATCACAGGCTTTTGAGGCAACTACAACGACAAAAACCACCATGGCTGTGGACCCTAGTGCCATGCTTAGGTTAAACGTGTGGTTGGATGAG…
G3.2	NODE_37130_length_1169_cov_2.051823	1169	2.05182	none	none	none	tr|A0A0M3VGG3|A0A0M3VGG3_9VIRU_Capsid_polyprotein_VP90_OS=Bovine_astrovirus_OX=1435485_PE=3_SV=1	68.1	401	CGTGGTATGTTGCCACAAACTCGCTGTATTCCCTACTGGGTTTGATTTGGTTCACAGCGAGAGCAGCCTTCCTATGCGAGCATCCGCTCGCTATAAGGGTATCATATATAGACTGGACTTCGGGCTCAACCCGGAGAAGCTCAACAGGTGGCTCGTCGAAGTACAACGTTTCCTCGTCCTCTGTGCTGGCGACAGGTACATCATGGAAAACTTCTTGTTGGGTAGTAGCACCAAACACAAGGGCTGCACCATACCCCACAGGAAGACCAATATTGGGGTCCCCGCGGGATGATGGTATGGTGTACGTAGATGGTGTGTTATTCCACCCATCGTTGGGTTCCTTAATCTCGACCCCCATCAATGTGATGGTGCGACGGGGGCCCCCAACACATAAGTACT…
G5.1	NODE_163_length_6255_cov_976.507343	6255	976.507	NC_023630.1_Bovine_astrovirus_B76-2/HK,_complete_genome	73.1	3881	tr|A0A0M3VGG1|A0A0M3VGG1_9VIRU_ORF1a_OS=Bovine_astrovirus_OX=1435485_PE=4_SV=1	68.5	818	GGCGCTCTTTCTGAATCGAGCGGACGAAGCTATTGCCTCCGGTGATCAGATCCAGCTCAAAGCTCGCTTTGACGCTAGGTGCTGGTTTGATGAGTTGAGGAGGATCAACCCCATAGTACCGTGGTATATCACATATCAGCCACGTATGTACTTCTACCCAACTCTCAAATCGGACCGCGTCTTGACAGCGAGCACTGTTGATGAGGATGAGTGGCGAACTTTCGTGCTCACCACAAAGGGATGTGAGCACGTTGCAGTTGAGGTTAACCATATACCCGATCATCAAGCTACAATTCTCACAGCAGCGCTGATGAATGATCGTGCCAACCGGAAGAGGGAATTATCTGACCTGAAGTTGGAGAACCAGATCCTGAGAGCGGAGCTTGCGCAACACCGCAA…
G6.1	NODE_3769_length_2481_cov_8380.352591	2481	8380.35	LC047796.1_Bovine_astrovirus_genomic_RNA,_nearly_complete_genome,_strain:_BoAstV/JPN/Kagoshima1-7/2014	72.085	609	tr|A0A0M4UFN2|A0A0M4UFN2_9VIRU_ORF1ab_OS=Bovine_astrovirus_OX=1435485_PE=4_SV=1	66.7	823	AAGCAGTGGTATCAACGCAGAGTACGGGGAACCGAGCAGACGAAGCTATTGCCTCCGGTGATCAAACTCAACTCAAAGCTCGCTTTGACGCCAGGGACTGGTTTGATGAGTTGAGGAGGATAAACCCTACAGTACCGTGGTACATCACATACCAACCACGCATGTACTTCTATCCAACTCTCAGATCCGACCGCGTCTTGACAGCGAGCACTGTCGATGAGGAAGAGTGGCGCACTTTTGTGCTCACCACAAAGGGCTGTGAGCACATCGCAGAGGAGGTTAATCATATACCCGACCACCAAGCCACAATCCTCGCGGCGGCGTTGATGAATGATCGCATAAACCGGAAGAGGGAATTATCTGACCTGAAGCTGGAGAACCAGATTCTGAGGGCGGAAC…
G8.1	NODE_1451_length_4188_cov_10.607732	4188	10.6077	LC047790.1_Bovine_astrovirus_genomic_RNA,_nearly_complete_genome,_strain:_BoAstV/JPN/Hokkaido11-55/2009	82.754	2905	tr|A0A0M5MYM6|A0A0M5MYM6_9VIRU_ORF1ab_OS=Bovine_astrovirus_OX=1435485_PE=4_SV=1	96.4	506	CAAGGAGGCAGCAGGTTTCCCTGAGTGGGAGCCCATGGATGATGATTACAATCCCGATGACGATTGGGTCTTTGACTCTGATACACCATACGGCCAGAAAACTGTTGTGATACCATCCTTCACACAGTACTGTCGCCGTGAATATGACCCAACCGATGTCGATGGCATGGTTCAACAACTTAGTGCTGCTGACCTTGAAGCGCTTGGCCCCCTCGTCAAGGTTATTATCAACACCTCCCGGGTCAAGAATCCACTTGGTCCGGTTATGTGCTTGTCCGATCGGTACGCTGCTTATCATGGCCTACCACCCATCTCTGATGGTCTACCTTATAAGCAGCGCTCCAAACCAAAAAACTCCAAGGGGGGGGACAAGCGCCCCCCAAAGCCAACAGCTTAGGG…
G8.2	NODE_1786_length_3791_cov_11846.213701	3791	11846.2	NC_023632.1_Bovine_astrovirus_B170/HK,_complete_genome	83.164	3451	tr|F6LD25|F6LD25_9VIRU_Nsp1a_OS=Bovine_astrovirus_B170/HK_OX=1027244_PE=4_SV=1	84.9	815	GCTTTTCACTTTTTTGGCACTCGGCATATGCGCTCACCACCACGTCGACCACCGATGCAGTTAACCCGATGGAGATGTTGAAGCTCAATGTCTGGCTCGAGAGGTCGACGTGGTGGTGAGCGCATATGCCGAGTGCCAAAACAGTTCAGATAGAGCCAGTTCTTGCATGCTTAATAGCAATGTCACTCTACCTAAACCGCGCTGATGAAGCGCTCGCATCCAATGATAAGACCCAGCTCAAGGCGCGTTTTGATGCGCGCGACTGGTTTGACGAGTTGCGGAAGATCTCTCCAACCACGACGTGGTATATAACATACCAACCACGTTTCTTCTTTTACCCAACTCTCAGGCCAGACCGTATCTTGACCGCGAGCACAGTCTGTGAAGAAGAGTGGCGGA…
G8.3	NODE_13425_length_1328_cov_62011.164863	1328	62011.2	NC_023632.1_Bovine_astrovirus_B170/HK,_complete_genome	81.445	1315	tr|A0A221LEB1|A0A221LEB1_9VIRU_Capsid_polyprotein_VP90_OS=Porcine_astrovirus_2/BEL/15V010_OX=2017723_PE=3_SV=1	84.6	208	AACCTCGAAGCGCTCCTCGCCTGAGCGGACCGGCGCACCTGCTATGCGTTTTAGGAACCACCACCCGCCTCTAAGGAGCCAGCTGAAAGGGGCTGGAAAAGCGGTAGCACCCGCCTGGATCACCGCATCGGTGACCATCCATATTATCTCACTGGCTGTTGTGGTAGCTGCTGCCCGTGCCAAAGCACTAGTGCCAGGTGTTGTCAAAATTATCTTGCCAGCCTCGTCAGTGGAAATTGTGGCATTCCCCGTGCTATCTCCCTTGAGAAGGTTAAGACCAGGTTGCTGACTATAATCCTTGAAAGCCCAAACGACATCAAGCTCGGCAAGGAACAACCCACCTGTGAATTTCCCATTCTGGTAAGTACTCATGGTCTCACCAAGGGTGTGAATTTCAAG…
G8.4	NODE_43588_length_522_cov_48747.060759	522	48747.1	NC_023629.1_Bovine_astrovirus_B76/HK,_complete_genome	90.159	315	tr|F6LD26|F6LD26_9VIRU_Capsid_polyprotein_VP90_OS=Bovine_astrovirus_B170/HK_OX=1027244_PE=3_SV=1	63.1	149	TTTTTTTTGTCCCCTTCACCTATGCTAATCAAATCACAAATGAAACTGAAAAATGATTAAAAACAAGCACGACGCGCGCGCCATCCTAGAGCCCAAGGGCAAACGCCCTCGCGGCCCTAGGTGATAGGCCGTCAACTAACGCGTCGTGGTACAGGCTGGTGAAATCCCTGTACTCATCGCTTGGATGCAGCTGATTTACTGCCAAGCGGGCATCCCGTTCTGGATGGGTCCTGAGAAGCATCTCATAGGTACCCTGTACTGAGGGATGCACCACACACCGGGATAATGGTGGCACATCATAATCATCACCTGGCTCCATCTCAAGGGATGGATCGGGCTCCTCCTCCTCGATGTCATCCCCGCTGTCCTCGCACTCGTCAGGGTCATCACAGGTGTCAT…
G8.5	NODE_43669_length_521_cov_80254.989848	521	80255	LC047789.1_Bovine_astrovirus_genomic_RNA,_nearly_complete_genome,_strain:_BoAstV/JPN/Hokkaido11-7/2009	88	50	tr|F6LD26|F6LD26_9VIRU_Capsid_polyprotein_VP90_OS=Bovine_astrovirus_B170/HK_OX=1027244_PE=3_SV=1	78.8	132	GAAAGGTGTCCACCCGCCACGTTGTGTTTCCTGACAACGTTGAGGAAGTTTTGGCGACGGCAACGCCGGTGAGCACGCCATTGCCAGACCCACCCACACGTATGTAGATGGGAATTTTATGTCAAAAGATCAACGTTGGGTGGCTCGCGGAAGGTGACTTCCAAGACATTAAAGGTGGCGCGTATCACCCCATCTGCGACAAAGGCCACACCAGTCTGAGGGTTCTGGTTCCCATCCTGGACATGATACCACACATCAAACCCTGGGACGTACTCGTTGCCCGAGTTGAACTTCAGACGACGGGACCCTGTTGGTGTGAAAACATCAGTGTTTGTGTAGAAGGGGTCCTCCAGAGCCCGAACTTGTGGGATGTCTGTAGATATACCAGTGTTACCAGGC…
D2.1	NODE_25438_length_886_cov_6.997365	886	6.99737	NC_023631.1_Bovine_astrovirus_B18/HK,_complete_genome	98	50	tr|A0A1D6Y6S4|A0A1D6Y6S4_9VIRU_Capsid_protein_OS=Water_buffalo_astrovirus_OX=1495051_GN=ORF2_PE=4_SV=1	39.3	267	TCCCCTTCACCTATGCAATCAAATCACAAATGAAACTGAAAAACTGATTAATTATGATTTACGATATGTGTGTGAAACCTACACGGCCATAGCATACGCTCTGGCCTGCGCAGGGCTGAAACCATCACACAACATATCATGGTACGTGGACATAAAATCCTCGTACTCCTCGCACGGATACAGCTGATTTGCTGCACGTGCGGCATCCTTGTGTGACTCACCAAGGGAAATAAGATTATCATAAACCCGCTGTGCCTTGAAATTAGATATTTTCAAAACACTAACTGGTGGGTCCCCATAATTATCATCAGGTTCCATCTCTAGGGCTTCATCATCACTATCATGATCAACAAGATCAGCAGCACGCTGAACAGCATTATCAGACAAATTTAATTTCAC…
D5.1	NODE_1757_length_1263_cov_1.519366	1263	1.51937	none	none	none	tr|F6LD29|F6LD29_9VIRU_Capsid_polyprotein_VP90_OS=Bovine_astrovirus_B34/HK_OX=1027246_PE=3_SV=1	39.5	420	AAGTGCTGTATGATATATTTCCATCCATGACGGATGCACAGAATGATAAGTACATCTACAGTACAAATAGGAATTTTGAGGGCACCAACATTGAGCAAGTGCAGTATCAACAGATCACTCCATCAAATACTGGCATTGCCAGTGAGTCTCTTGTTGAACGCCAAGTCATCCGCCAGCCTGGTGGTTATTACATAGAAACATTGCAGTCCATGCCTGAGCAGACCTGGGTGCCAGCACAACCACTCTATATAGAGAAAGCAACTAATGCCTCGCCTTCTGTTGCCGTTCCGCGCTCAGAGCGTGGCTTAAAAGTTAAATTTGGGAGCAACTGGATAACTACATATAACATGCTTAAGGTTGGTGTGGATGCCCCCGAACCAACCCAAGGAGTTCCAATGT…
S3.1	NODE_7261_length_967_cov_3.925000	967	3.925	KX266906.1_Bovine_astrovirus_CH13/NeuroS1_isolate_42799,_complete_genome	83.446	296	tr|A0A1B1LV98|A0A1B1LV98_9VIRU_Structural_polyprotein_OS=Bovine_astrovirus_CH13/NeuroS1_OX=1881636_GN=ORF2_PE=4_SV=1	57.2	306	GAATTAAGTAAACCAGAATCCTGTACCCTCGATCCTACTCGGCGTGGCCTCGGGATTTAAGTTTACGAATCAAAGCAGCCGCATCCGCGTGGGACTTGGTCCCGCGCACGCCCTCATAGATTTGCTGTAAGGGAGTGCTACGCAGGCATTCAAAATCATCCGGCTCGGAATCACTCGAGTCGGACCCGGAATCGCTGGCAAATCTATAGCGAGACCGGAGCTGCTGAACCACGCGCTCAACCAGATCATCTTCATCTGTGGGGCGGACACCACGCGTCATCCGTGTTATGCCAAAAGATGCAAGAGGGATGAGCCGGGGCATGAATGAAAACACGCCTGAAGCATCAATACGCATTGCTGCGCCGTCAATGCTGAAAGCGTCCTTCTGCAGGGCAGCAT…
S4.1	NODE_2295_length_2065_cov_36.156863	2065	36.1569	KJ476839.1_Bovine_astrovirus_strain_BAstGX_G1_capsid_protein_precursor,_gene,_partial_cds	82.67	352	tr|A0A060BCT2|A0A060BCT2_9VIRU_Capsid_polyprotein_VP90_OS=Bovine_astrovirus_OX=1435485_PE=3_SV=1	52.6	667	TTTTTTCACCTATGCTAATTAAATCACAAATGAAACTGAAAAACTGATTAAAATAAAAATGCACGACGCGCGCGCCATCCTAGATCCCCAAGGCATGGGCTCTTGCAGACCTAGGTGATAGGCCATCAACTAACGCATCGTGGTACAAGGCGGCAAATTCCTTGTACTCATCGCTTGGTTTCAGCTGATTTACTGCCAAGCGGGCTTCCCGTTCTGAATAAAGCTCAAGCAAAAGCTCATAGGTTTTGCGAGCATCTGGATGAACCACCAACCGGGACATTGGTGGCGTATCATAATCATCAAAAGGGCCCATTTCAAGCTGTTCATCAGTGAGGTCCTCATCTTCGTCATCTGTATCATCATCATCCTCCAAAGGTGGTAAGTCCTGGAACTCATCTT…
S4.2	NODE_5239_length_1184_cov_6.722800	1184	6.7228	KP747573.1_Mamastrovirus_3_isolate_AstV-LL-1,_complete_genome	76.149	457	tr|A0A0M3VGG5|A0A0M3VGG5_9VIRU_ORF1ab_OS=Bovine_astrovirus_OX=1435485_PE=4_SV=1	81.9	166	ATCCTTTTGAATTCTTTGATGTAAGGCCCCCAGCCATAACAATCCATATAGTCACGCTCACTATCATGAACTTCACATTTTGGATACCCTGGTGTAGAGTCAATGTTTTTCTCAGTGGCTGTTATGTGCTTCACTCGGGTGTCTTCGAGGAAGTTATAGTGTTTGCGCCATTGGTGATCAGCAAACTTGCACTCTTCAGGATATAGTTCCCAAAACTTTGATGGTTGGGCGTAACTAAATTTCTCAAATGACTTTGTGTAGGCTTCGGGGCCCCATACAGCGGGGGCAAAAGCCAAATCTGGGTCACAAGGTGGGAGCAAACCAAGAAGTGGGTCATCAGGGACTTTGTCATCAAAAATGGGTCTATTTATGGGCAGATTATAAACCACTGGGTAGTCG…
S5.1	NODE_1258_length_6246_cov_3144.507436	6246	3144.51	NC_023630.1_Bovine_astrovirus_B76-2/HK,_complete_genome	73.416	3566	tr|A0A0M3VGG1|A0A0M3VGG1_9VIRU_ORF1a_OS=Bovine_astrovirus_OX=1435485_PE=4_SV=1	67.8	791	GGGGAACTGGTTTGATGAGTTGCGGAGGATACATTCAACAGCACCGTGGTACATTTCGTATCAGCCACGAATGTATTTCTTCCCAACCCTCAGGTCAGACCGTGTCTTGACTGCTAGTACGGTCTGTGAGGAGGAGTGGCGCACTTTCGTACTCACCACACAGGGATGTGAGTACATTGCGGTCGAGGTGAATCATATACCCGACCATCAGCCCACTATCCTCACAGCAGCACTTATGAATGATCGTGCTGACCGGAAGAGAGAATTATCTGACTTGCGCCTTGAAAACCAGCTTTTGAGAGCAGAACTGGCCCAACACCGTAATGAAGAGAGGAGCACAACCAAGTTTGTTCTGAGTTGGCCTACCATCTTTGCTCTGGTTTTTCTTGGCTTTTCTAT…
S5.2	NODE_7684_length_2456_cov_18.632460	2456	18.6325	NC_023632.1_Bovine_astrovirus_B170/HK,_complete_genome	77.6	2058	tr|F6LD26|F6LD26_9VIRU_Capsid_polyprotein_VP90_OS=Bovine_astrovirus_B170/HK_OX=1027244_PE=3_SV=1	77.2	719	AATATGTGGAAAAGTGCCTCGCCGCGCTGGAGCATGGCCGCTCCCTGCCTAAAATAACAAATGAGCAGCTGGATCGTCTTTGGAGGGGAGGACCAAAGACAACTCCTAATGGCTAGTCGTTCTCAGAACAGGCGTGCCGCGCGCACTACAACCAACATTGTGGTGCGCAATGGACCAGCTGCACCCACAGGGAGGGGGCAGCAACCCAGACAGCAACAACAGCAGCAGCGCCGTCGACGGCGCAGGGGAGGTGCGACAGCCCAGGTGGTGCGGGTGCTACCCGCGAAAAATCAGGCTCGCAGGGGGAGGACTGGGGTTCCACGGTTCAATAACCGTGTGGTTGTCCAGAAGATTGTCACAACTCTCGGCACGGTCGGCTCCAATGGATCAGGAAGCATA…
S6.1	NODE_82_length_6130_cov_281.699817	6130	281.7	NC_023630.1_Bovine_astrovirus_B76-2/HK,_complete_genome	73.729	3148	tr|A0A0M3VGG1|A0A0M3VGG1_9VIRU_ORF1a_OS=Bovine_astrovirus_OX=1435485_PE=4_SV=1	68.3	779	CCAACAGCACCGTGGTATGTTTCATATCAACCGCGGATGTATTTCTTCCCAACTCTCAGATCGGACCGTGTCCTGACAGCTAGTACGGTCTGTGAGGAAGAGTGGCGTACCTTTATGCTCACCACACAGGGTTGTGAGCACATTGCGGTCGAGGTCAACCACATACCCGATCACCAGCCCACCATCCTCACAGCAGCATTGATGAATGATCGTGCTGCCCGGAAGAGAGAACTATCTGACTTGCGCCTTGAAAACCAAATTTTGAGAGCAGAATTGGCCCAACACCGTAATGAAGAGAGGAGCACCACTAAATTTGTTCTGAGTTGGCCAACAATCTTTGCTTTGGTTTTCCTTGGCTTCTCCATGTTTTGGCATTCCGCACACGGGCTTACCACCACG…
S6.2	NODE_3493_length_1820_cov_7.113999	1820	7.114	LC047793.1_Bovine_astrovirus_genomic_RNA,_nearly_complete_genome,_strain:_BoAstV/JPN/Hokkaido12-25/2009	80.939	1810	tr|A0A0M4U1R6|A0A0M4U1R6_9VIRU_ORF1ab_OS=Bovine_astrovirus_OX=1435485_PE=4_SV=1	88.4	440	CTCCAAGCTTCTACCAGCGGGCGCGTAGGCGCCTACGGCAGGCCCTTAAGACATTCCGTGCTCCTTCCTTTCCAATACCATCAAATTGCCTCGTTCACATCACTTCTGATAGTGGGACTGGCACGGGTTTTCGCACGGGCAACTACTTGGTAACTGCGCGTCATGTCGTGGCCGGGGCACCCTCTGTTGAGGTTTCCGTTGGTTCCTTGACGACAACACTCACTGCAGCTGATTGGCTCCCACTTGGAGATCGGGATATAGTCAAAGCCAAGCTCCCCGCAGTCTTTCAGCACCTGTCTTCGGTCCGCGTTGCCGAAAAGAGCTCAAATGATTGGATTGCTTTGCTCACTTTTGCTGCCAACGGTTCCTACTATCAGCTCGCAGTCGGTGATGGCCTCT…
S6.3	NODE_3529_length_1813_cov_60.965006	1813	60.965	LC047793.1_Bovine_astrovirus_genomic_RNA,_nearly_complete_genome,_strain:_BoAstV/JPN/Hokkaido12-25/2009	74.833	1800	tr|A0A0M4UP88|A0A0M4UP88_9VIRU_Capsid_polyprotein_VP90_OS=Bovine_astrovirus_OX=1435485_PE=3_SV=1	85	565	TGGTATCAACGCAGAGTACGGGGGTCTGGTCTTGGTGCTCGGAAGCATGTTGATGCCACGCCTGGGCGCCGGGTTGAGTTCCGGCTAAGCCGCCGTGACATGCAGGGCCCCCGAGACGGTTGGTGGTACACAGATACGTCCAACGGCATACAGAATGCTGCTGGGCCCACCATTGAGATACATTCCTATGGTAAAACAGTTTCCACCTTCCAGGCCACTGCTTGGTCTGGCGAGCTCTGGCTTGTCGAACTACGCGCAACCTGGCAGTTCACCAATTGGAACATGAACCCGCGCTTATTGTCCCTAGTCGACACTAAGCTGCCTGAAGGCAACCTTAAACTTTCATCTTCAGCTGCAGGCGCTCCCGTCGTCTTGACGGTTGAGAAAACAGCCAATGCC…
S6.4	NODE_5103_length_1513_cov_1.341270	1513	1.34127	none	none	none	tr|A0A0M3VGG3|A0A0M3VGG3_9VIRU_Capsid_polyprotein_VP90_OS=Bovine_astrovirus_OX=1435485_PE=3_SV=1	64.6	500	GAAAGGAAAATCCTGCGGAAATCATTCCACAGTTCATTCATGGCCTAGGGCCGCTGCCCTGGCCGAGGCAGGCGAAAACCCATCCACGAGAGAGTCGTGGTAGGTTACTACAAAATCAGAATATGGCTTGCTGGGTTTTATTTGATTAACAGCAAGCTTGGCCTGCCGACGCGAGCATCCGCTCGCAACGAGCATATCATATATGCCCTGGACTTCTGGTTCAATCCGGAGTACACTGTCGGGTGGTTCATCAAAGTAAAGACCATCATCACCACTATCTTGGTCCCCCCCAACATCATCCTCAAGGTAATCTACTGCATCCTCATAGGCCTCATAAACAGCCTGGCCCCTAAAAATGAGTGGTGTGCAATAGGAGACAGGTAGGCCCTTTGTAGGATC…
S6.5	NODE_19010_length_530_cov_0.406948	530	0.406948	none	none	none	tr|A0A0M4U1R6|A0A0M4U1R6_9VIRU_ORF1ab_OS=Bovine_astrovirus_OX=1435485_PE=4_SV=1	93.8	176	TCAGGCAAATCCTGTGTGCTGACCCCATCTATGGGCGTATTGGCCTCATGTTTGACCAACAACAGAATGTCCGTGTTAAGGAAAGGACAGAAGACAAGTCATCTCAAGTTGGCTGGACGCCCTTTTTTGGCGGCTTTCAATCACGCATTCGCCGCCTTGCGTCTACTGGTGCACGCTACTGGGTTGAGGTTGATTGGACCCGTTACGACGGGACTATTCCACAACAGCTCCTCCGTATAATTCGTGAGGTACGCTGGGAGTTTCTTGACGACACCTACAAGACTCCTGCCAATCGTAGGCTCTACGACTGGTATGTGCATAATCTCCTCAACCGCTATGTTCTCTTGCCCTCGGGTGAGGTCACCTATCAGCAACGTGGCAATCCTTCCGGACAAGTCT…
